# Supplementary material for: Demand for low-quality offsets by major companies undermines climate integrity of the voluntary carbon market
Source: PubMed Central journal article supplement — Nat Commun. 2024 Aug 10;15:6863. doi: 10.1038/s41467-024-51151-w (PMC11316763; doi:10.1038/s41467-024-51151-w), 2024-08-10
Supplement: 41467_2024_51151_MOESM1_ESM.pdf [file 41467_2024_51151_MOESM1_ESM.pdf]

## **Supplementary information for**

Demand for low-quality offsets by major companies  
undermines climate integrity of the voluntary carbon market

**Table S1. Relative share of offsets retired by the twenty studied companies compared to all retirements made globally on each registry over 2020-2023**

| Registry                          | Global total<br>(Mt CO <sub>2</sub> e) | Twenty<br>company<br>total<br>(Mt CO <sub>2</sub> e) | Global<br>share<br>(%) |
|-----------------------------------|----------------------------------------|------------------------------------------------------|------------------------|
| Clean Development Mechanism (CDM) | 120.03                                 | 26.41                                                | 22.00                  |
| Gold Standard (GS)                | 97.56                                  | 5.16                                                 | 5.29                   |
| Verified Carbon Standard (VCS)    | 428.72                                 | 102.57                                               | 23.93                  |
| Total                             | 646.32                                 | 134.14                                               | 20.75                  |

Data from registry websites: CDM<sup>1</sup>, GS<sup>2</sup> and VCS<sup>3</sup>. The global volume of CDM credits reflects units voluntarily cancelled through the regular CDM registry process and excludes those processed via the online platform.

**Table S2. Overview of twenty studied company's net-zero plans and use of offsets**

| Company                        | Sector                   | Country of headquarters | Claim or pursue net-zero? | Target year | Scope 1 & 2 | Scope 3 | Use offsets to compensate own emissions? | Details                                                                                                                                           | Source 1             | Source 2             |
|--------------------------------|--------------------------|-------------------------|---------------------------|-------------|-------------|---------|------------------------------------------|---------------------------------------------------------------------------------------------------------------------------------------------------|----------------------|----------------------|
| Shell                          | Energy                   | Netherlands             | Y                         | 2050        | Y           | Y       | Y                                        | Also supplies carbon-neutral products/services such as LNG cargos and fuel purchasing for fleets and individual drivers.                          | <a href="#">Link</a> | <a href="#">Link</a> |
| Delta Airlines (Delta)         | Airline                  | USA                     | Y                         | 2050        | Y           | Y       | Y                                        | Also supplies carbon-neutral flights to passengers.                                                                                               | <a href="#">Link</a> | <a href="#">Link</a> |
| Volkswagen                     | Automotive manufacturing | Germany                 | Y                         | 2050        | Y           | Y       | Y                                        | Also offers customers the opportunity to choose carbon-neutral production and delivery when purchasing electric vehicles.                         | <a href="#">Link</a> | <a href="#">Link</a> |
| Banco Votorantim BV (Banco BV) | Finance                  | Brazil                  | Y                         | 2030        | Y           | -       | Y                                        | Asides from operational emissions, also offsets emissions caused by vehicle loans.                                                                | <a href="#">Link</a> | <a href="#">Link</a> |
| Eni                            | Energy                   | Italy                   | Y                         | 2050        | Y           | Y       | Y                                        | Also supplies carbon-neutral products/services such as LNG cargos.                                                                                | <a href="#">Link</a> | <a href="#">Link</a> |
| Telstra                        | Telecommunications       | Australia               | Y                         | 2050        | Y           | Y       | Y                                        | Claims to have reached carbon-neutral operations in 2020. Also offers customers carbon-neutral mobile phone and Internet plans.                   | <a href="#">Link</a> | -                    |
| Audi                           | Automotive manufacturing | Germany                 | Y                         | 2050        | Y           | -       | Y                                        | Claims to have reached carbon-neutral operations for plants in Győr and Brussels. Is aiming for carbon-neutral operations for all plants by 2025. | <a href="#">Link</a> | <a href="#">Link</a> |
| Takeda                         | Pharmaceutics            | Japan                   | Y                         | 2040        | Y           | Y       | Y                                        | Target for 2035 concerns scopes 1 and 2. Target for 2040 concerns scope 3.                                                                        | <a href="#">Link</a> | <a href="#">Link</a> |
| Sasol                          | Energy, Chemicals        | South Africa            | Y                         | 2050        | Y           | Partial | Y                                        | -                                                                                                                                                 | <a href="#">Link</a> | -                    |
| DPD                            | Logistics                | France                  | Y                         | 2040        | Y           | Y       | Y                                        | Claims to deliver carbon-neutral parcels at no extra cost to customers. Has limited offsetting of scope 1-3 emissions to 10% for 2040 goal.       | <a href="#">Link</a> | <a href="#">Link</a> |
| Boeing                         | Airplane manufacturing   | USA                     | Y                         | 2020        | Y           | Partial | Y                                        | Claims to have reached carbon neutral across manufacturing and operations (Scope 1-2) since 2020.                                                 | <a href="#">Link</a> | <a href="#">Link</a> |
| Chevron                        | Energy                   | USA                     | Y                         | 2050        | Y           | Partial | Y                                        | Also supplies carbon-neutral products/services such as LNG cargos and fuel purchasing for fleets and individual drivers.                          | <a href="#">Link</a> | <a href="#">Link</a> |

|                                               |                          |                |   |      |   |         |   |                                                                                                                                                                                                         |                      |                      |
|-----------------------------------------------|--------------------------|----------------|---|------|---|---------|---|---------------------------------------------------------------------------------------------------------------------------------------------------------------------------------------------------------|----------------------|----------------------|
| Gucci                                         | Fashion manufacturing    | Italy          | Y | 2050 | Y | Y       | Y | Claimed to have been carbon neutral across direct operations and supply chain (Scope 1-3) since 2018. It dropped these claims in 2023.                                                                  | <a href="#">Link</a> | -                    |
| PetroChina                                    | Energy                   | China          | Y | 2050 | - | -       | Y | Also supplies carbon credits to other clients.                                                                                                                                                          | <a href="#">Link</a> |                      |
| easyJet                                       | Airline                  | England        | Y | 2050 | Y | -       | Y | From 2019 to June 2023, offset the carbon emissions from the fuel used for all flights free of charge. Also supplies carbon-neutral flights and hotels/transfers at holiday destinations to passengers. | <a href="#">Link</a> | <a href="#">Link</a> |
| EY Global (EY)                                | Consulting               | England        | Y | 2025 | Y | Y       | Y | Claims to be carbon negative since 2021 and to avoid or remove more carbon than emitted from own operations.                                                                                            | <a href="#">Link</a> | <a href="#">Link</a> |
| Norwegian Cruise Line Holdings (Norwegian CL) | Marine transportation    | Norway         | Y | 2050 | Y | Partial | Y | -                                                                                                                                                                                                       | <a href="#">Link</a> | <a href="#">Link</a> |
| Yamato                                        | Logistics                | Japan          | Y | 2050 | Y | -       | Y | Claims to have achieved carbon neutral parcel delivery since 2022.                                                                                                                                      | <a href="#">Link</a> | <a href="#">Link</a> |
| Hu-Chems Fine Chemicals (Hu-Chems)            | Chemicals                | South Korea    | - | -    | - | -       | - | -                                                                                                                                                                                                       | -                    | -                    |
| Skoda                                         | Automotive manufacturing | Czech Republic | Y | 2050 | Y | Y       | Y | Also offers customers the opportunity to choose carbon-neutral production and delivery when purchasing electric vehicles.                                                                               | <a href="#">Link</a> | <a href="#">Link</a> |

Data from company websites and Net Zero Tracker<sup>4</sup>. Cells marked with ‘-’ indicate cases where insufficient evidence was available. Company names in brackets indicate abbreviations used throughout the paper.



|                      |       |       |       |       |        |      |      |      |      |      |   |      |      |      |      |
|----------------------|-------|-------|-------|-------|--------|------|------|------|------|------|---|------|------|------|------|
| Hu-Chems             | 1.82  | 0.63  | –     | –     | 2.45   | –    | –    | –    | –    | –    | – | –    | –    | –    | –    |
| Skoda                | –     | 0.58  | 0.64  | 1.21  | 2.42   | –    | –    | –    | –    | –    | – | –    | –    | –    | –    |
| <b>All companies</b> | 20.12 | 38.66 | 39.52 | 32.46 | 130.76 | 0.28 | 1.11 | 1.13 | 0.56 | 3.09 | – | 0.04 | 0.02 | 0.23 | 0.29 |

Years with no retirements in that category are marked with ‘–’. Total columns show the sum of all retirements made over 2020-23 for that category of offsets. Some volumes shown in total columns may not match volumes in individual years due to rounding of decimal places.



|                      |        |        |        |        |        |      |      |      |      |      |   |      |      |      |      |
|----------------------|--------|--------|--------|--------|--------|------|------|------|------|------|---|------|------|------|------|
| Hu-Chems             | 100.00 | 100.00 | -      | -      | 100.00 | -    | -    | -    | -    | -    | - | -    | -    | -    | -    |
| Skoda                | -      | 100.00 | 100.00 | 100.00 | 100.00 | -    | -    | -    | -    | -    | - | -    | -    | -    | -    |
| <b>All companies</b> | 98.64  | 97.10  | 97.17  | 97.60  | 97.48  | 1.36 | 2.80 | 2.78 | 1.69 | 2.30 | - | 0.10 | 0.05 | 0.71 | 0.22 |

Years with no retirements in that category are marked with '-'. Values in columns show the share of all retirements in that year relative to the other two categories (i.e. removal, mixed etc.). Values in the total columns show the share of all retirements in that category during 2020-23 relative to the other two categories. Some volumes shown in total columns may not match volumes in individual years due to rounding of decimal places.



**Table S4. Share of credits retired by company and by registry**

| Company              | Registry share (%) |             |              |
|----------------------|--------------------|-------------|--------------|
|                      | CDM                | GS          | VCS          |
| Shell                | 0.59               | 2.95        | 96.46        |
| Delta                | 24.59              | –           | 75.41        |
| Volkswagen           | 0.00               | 5.78        | 94.22        |
| Banco BV             | 97.57              | –           | 2.43         |
| Eni                  | 14.21              | –           | 85.79        |
| Telstra              | 19.67              | 3.27        | 77.06        |
| Audi                 | –                  | 1.25        | 98.75        |
| Takeda               | 21.32              | 15.25       | 63.43        |
| Sasol                | 72.41              | –           | 27.59        |
| DPD                  | –                  | –           | 100.00       |
| Boeing               | –                  | 5.48        | 94.52        |
| Chevron              | 40.21              | –           | 59.79        |
| Gucci                | –                  | –           | 100.00       |
| PetroChina           | 1.25               | –           | 98.75        |
| easyJet              | –                  | 31.41       | 68.59        |
| EY                   | –                  | 16.24       | 83.76        |
| Norwegian CL         | –                  | 0.01        | 99.99        |
| Yamato               | –                  | –           | 100.00       |
| Hu-Chems             | 100.00             | –           | –            |
| Skoda                | –                  | 46.44       | 53.56        |
| <b>All companies</b> | <b>19.69</b>       | <b>3.85</b> | <b>76.47</b> |

Registries with no retirements are marked with ‘–’.

|               | Vintage year |      |      |      |      |      |      |      |      |      |      |      |      |      |      |      |      |
|---------------|--------------|------|------|------|------|------|------|------|------|------|------|------|------|------|------|------|------|
|               | 2006         | 2007 | 2008 | 2009 | 2010 | 2011 | 2012 | 2013 | 2014 | 2015 | 2016 | 2017 | 2018 | 2019 | 2020 | 2021 | 2022 |
| Shell         |              |      | 8.8  |      | 21.8 | 0.9  | 7.6  | 10.9 | 7.2  | 17.3 | 9.5  | 10.8 | 1.6  | 0.5  | 0.8  | 2.6  |      |
| Delta         |              |      |      |      | 11.3 | 0.5  | 2.4  | 6.4  | 11.7 | 18.0 | 28.8 | 6.6  | 3.3  | 6.9  | 3.3  | 0.8  |      |
| Volkswagen    |              |      |      |      |      |      |      |      |      |      | 1.0  | 8.2  | 26.3 | 30.9 | 15.8 | 17.8 |      |
| Banco BV      |              |      |      |      |      |      |      | 1.5  | 18.0 | 8.8  |      | 40.3 | 30.6 |      |      |      | 0.8  |
| Eni           |              |      |      |      |      |      |      | 12.7 |      | 3.3  | 6.9  | 12.8 | 16.8 | 24.6 | 22.8 |      |      |
| Telstra       |              |      |      |      |      |      |      | 0.5  | 5.2  | 3.6  | 1.0  | 4.4  | 23.2 | 23.7 | 26.1 | 12.2 |      |
| Audi          |              |      |      |      |      |      |      | 0.2  | 0.7  | 0.2  | 0.2  | 0.3  | 28.7 | 21.4 | 25.1 | 23.4 |      |
| Takeda        |              |      |      |      |      |      |      |      |      |      | 34.2 | 35.0 | 16.8 | 11.1 | 2.9  |      |      |
| Sasol         |              | 2.2  | 38.0 | 7.4  | 1.8  | 4.2  | 11.9 | 19.1 | 11.5 | 1.0  | 1.6  | 0.8  | 0.4  |      |      |      |      |
| DPD           | 1.4          | 27.1 |      |      |      | 12.7 | 10.8 | 2.6  | 6.6  | 7.5  | 8.9  | 5.5  | 6.4  | 7.7  | 2.6  | 0.1  |      |
| Boeing        |              |      |      |      | 1.3  | 1.3  | 1.3  | 3.4  | 12.4 | 1.9  | 1.3  | 5.3  | 11.9 | 36.2 | 21.5 | 2.0  |      |
| Chevron       |              |      |      |      |      |      |      | 0.1  | 0.7  | 38.7 | 40.8 | 11.2 | 6.8  | 1.6  |      |      |      |
| Gucci         |              |      |      |      |      |      |      | 5.5  | 43.6 | 13.5 |      | 18.7 | 11.2 | 7.5  |      |      |      |
| PetroChina    |              |      | 7.6  |      | 48.1 |      | 9.4  | 0.8  | 13.1 |      |      | 4.2  | 4.5  | 5.9  | 4.5  | 1.9  |      |
| easyJet       |              |      |      |      |      |      | 7.3  | 6.2  | 5.6  | 11.8 | 6.9  | 4.2  | 11.2 | 39.9 | 4.5  | 2.3  |      |
| EY            |              |      |      |      |      | 5.7  | 0.7  | 15.0 | 7.8  | 6.7  | 5.8  | 6.7  | 13.0 | 8.5  | 11.4 | 17.8 | 0.9  |
| Norwegian CL  |              |      |      |      |      | 4.5  |      | 39.8 | 38.2 | 1.6  |      | 3.5  | 5.5  | 4.2  | 2.8  |      |      |
| Yamato        |              |      |      |      |      |      |      |      |      |      |      | 2.2  | 53.1 | 42.8 | 1.9  |      |      |
| Hu-Chems*     |              |      |      |      |      |      |      |      |      |      |      |      |      |      |      |      |      |
| Skoda         |              |      |      |      |      |      | 3.5  | 9.0  |      |      |      | 5.6  | 13.2 | 14.6 | 27.8 | 10.3 | 16.0 |
| All companies | 0.1          | 1.0  | 2.6  | 0.1  | 8.1  | 1.1  | 3.2  | 6.6  | 7.6  | 9.2  | 10.4 | 8.9  | 12.2 | 13.9 | 9.3  | 5.6  | 0.4  |

**Fig. S1. Relative share of credits (%) retired by company and by vintage year**

Values show the distribution of vintage years (i.e. the year that an emissions reduction activity occurred) for all credits sourced by a company over 2020-23. For example, 21.8% of credits retired by Shell had a vintage year of 2010. Darker colors indicator higher shares. Data excludes credits retired from CDM since this registry does not disclose vintage years. \*One company (Hu-Chems) has no credits recorded because it retired all of its credits from CDM.

|               | Age of credit vintage at time of retirement (years) |      |      |      |      |      |      |      |      |      |      |      |     |      |      |      |     |
|---------------|-----------------------------------------------------|------|------|------|------|------|------|------|------|------|------|------|-----|------|------|------|-----|
|               | 0                                                   | 1    | 2    | 3    | 4    | 5    | 6    | 7    | 8    | 9    | 10   | 11   | 12  | 13   | 14   | 15   | 16  |
| Shell         |                                                     |      | 2.8  | 0.8  | 2.7  | 0.8  | 10.5 | 13.4 | 20.5 | 8.1  | 11.7 | 4.7  | 6.9 | 17.2 | <0.1 | <0.1 |     |
| Delta         | 0.3                                                 | 1.5  | 2.5  | 8.2  | 8.4  | 14.8 | 29.4 | 10.3 | 9.1  | 3.5  | 0.7  | 11.3 |     |      |      |      |     |
| Volkswagen    |                                                     | 16.6 | 32.3 | 21.3 | 11.8 | 16.5 | 0.5  | 1.0  |      |      |      |      |     |      |      |      |     |
| Banco BV      |                                                     |      | 0.8  | 30.6 | 40.3 |      | 8.8  | 18.0 | 1.5  |      |      |      |     |      |      |      |     |
| Eni           |                                                     | 1.6  | 22.2 | 41.8 | 14.1 | 7.6  |      |      | 1.4  | 0.4  | 10.9 |      |     |      |      |      |     |
| Telstra       | 0.4                                                 | 23.8 | 33.6 | 29.0 | 3.2  | 4.3  | 5.3  | 0.5  |      |      |      |      |     |      |      |      |     |
| Audi          |                                                     | 2.2  | 48.0 | 38.4 | 8.2  | 2.4  | 0.2  | 0.0  | 0.6  | <0.1 | 0.1  |      |     |      |      |      |     |
| Takeda        | 2.3                                                 | 6.0  | 15.3 | 34.8 | 40.5 | 1.3  |      |      |      |      |      |      |     |      |      |      |     |
| Sasol         |                                                     |      |      | 0.4  | 0.7  | 1.6  | 1.0  | 11.5 | 19.1 | 11.9 | 4.2  | 5.1  | 9.1 | 33.0 | 2.2  |      |     |
| DPD           |                                                     | 0.1  | 2.6  | 8.0  | 9.5  | 7.9  | 12.4 | 7.0  | 9.8  | 7.0  | 2.9  | 4.2  |     | 6.5  | 6.8  | 13.8 | 1.4 |
| Boeing        | 0.7                                                 | 14.3 | 11.5 | 31.4 | 20.4 | 1.9  | 12.4 | 3.4  | 1.3  | 1.3  | 1.3  |      |     |      |      |      |     |
| Chevron       |                                                     |      | 0.1  | 1.5  | 24.9 | 72.7 | 0.7  |      | 0.1  |      |      |      |     |      |      |      |     |
| Gucci         |                                                     | 7.5  | 7.5  | 15.0 | 7.5  | 1.5  | 10.5 | 29.8 | 20.8 |      |      |      |     |      |      |      |     |
| PetroChina    |                                                     | 1.0  | 4.5  | 6.0  | 5.2  | 0.1  | 4.2  | 10.6 | 1.5  | 5.7  | 4.5  | 13.4 | 7.8 | 35.5 |      |      |     |
| easyJet       |                                                     |      | 4.4  | 41.9 | 8.1  | 5.2  | 9.5  | 6.3  | 11.1 | 6.2  | 7.3  |      |     |      |      |      |     |
| EY            |                                                     | 3.3  | 27.7 | 13.1 | 6.6  | 6.0  | 5.0  | 21.7 | 2.2  | 13.7 | 0.7  |      |     |      |      |      |     |
| Norwegian CL  |                                                     |      |      | 3.4  | 6.0  | 5.9  | 0.6  | 0.4  | 22.0 | 41.8 | 15.5 | 2.0  | 2.4 |      |      |      |     |
| Yamato        |                                                     |      |      | 1.9  | 42.8 | 53.1 | 2.2  |      |      |      |      |      |     |      |      |      |     |
| Hu-Chems*     |                                                     |      |      |      |      |      |      |      |      |      |      |      |     |      |      |      |     |
| Skoda         |                                                     | 25.2 | 38.9 | 4.7  |      | 13.2 | 5.6  |      |      | 9.0  | 3.5  |      |     |      |      |      |     |
| All companies | 0.2                                                 | 5.2  | 14.1 | 16.0 | 10.1 | 9.0  | 9.4  | 7.2  | 8.2  | 4.6  | 4.4  | 3.5  | 1.9 | 5.4  | 0.3  | 0.5  | 0.1 |

**Fig. S2. Relative share of credits (%) retired by company and by age of vintage at time of retirement**

Values show the distribution of the age of vintage years for all credits sourced by a company over 2020-23. For example, 20.5% of the credits retired by Shell had a vintage aged eight years at the time of retirement. Darker colors indicator higher shares. Data excludes credits retired from CDM since this registry does not disclose vintage years. \*One company (Hu-Chems) has no credits recorded because it retired all of its credits from CDM.

|               | Project start year |      |      |      |      |      |      |      |      |      |      |      |      |      |      |      |      |      |      |  |
|---------------|--------------------|------|------|------|------|------|------|------|------|------|------|------|------|------|------|------|------|------|------|--|
|               | 2003               | 2004 | 2005 | 2006 | 2007 | 2008 | 2009 | 2010 | 2011 | 2012 | 2013 | 2014 | 2015 | 2016 | 2017 | 2018 | 2019 | 2020 | 2021 |  |
| Shell         | -                  | -    | -    | -    | -    | 31.8 | 0.7  | 51.2 |      | 7.1  |      | 4.2  | <0.1 | 1.3  | 0.3  | 0.1  | 0.1  | 3.2  | -    |  |
| Delta         | 0.1                | 0.1  | 0.1  | 0.4  | 2.5  | 12.3 | 2.9  | 26.2 | 9.0  | 6.4  | 16.8 | 2.3  | 12.3 | 3.9  | 4.0  | 0.4  | -    | -    | -    |  |
| Volkswagen    | -                  | -    | -    | 0.8  | -    | -    | 15.5 | 13.2 | 14.6 | 1.2  | -    | -    | 1.5  | 2.7  | 24.4 | 21.4 | 4.7  | -    | -    |  |
| Banco BV      |                    | 33.0 |      |      |      | 1.9  |      | 1.9  | 4.4  | 1.8  |      | 3.2  | 53.6 | <0.1 | 0.3  |      |      |      |      |  |
| Eni           |                    |      | 4.8  |      |      | 1.5  | 13.2 |      | 2.2  |      | 5.6  |      | 55.6 |      | 17.1 |      |      |      |      |  |
| Telstra       |                    |      |      | 0.4  | <0.1 | <0.1 |      | 3.4  |      | 17.6 | 9.1  |      | 0.4  | 5.8  | 63.4 |      |      |      |      |  |
| Audi          |                    |      |      | 1.8  | 0.8  | 0.1  | 34.1 | 10.3 | 0.5  | 0.4  | 0.2  |      | 10.7 | 6.5  | 30.4 | 4.2  | 0.1  |      |      |  |
| Takeda        |                    | 0.3  |      |      | 1.8  | 3.2  | 27.5 | 33.1 | 2.6  | 9.1  | 3.7  | 2.9  | 4.0  | 1.9  | 7.7  | 2.0  | 0.2  |      |      |  |
| Sasol         |                    |      |      | 0.1  | 70.3 | 13.6 | 0.6  | <0.1 |      | 9.1  | 6.4  |      |      |      |      |      |      |      |      |  |
| DPD           |                    |      |      | 14.1 | 20.3 | 15.4 | 17.0 | 8.8  | 11.2 | 7.3  |      | 2.6  | 3.4  |      |      |      |      |      |      |  |
| Boeing        |                    |      |      |      |      |      |      | 1.5  | 0.1  | 1.6  | 40.6 | 14.1 | 2.6  | 38.5 |      | 1.0  |      |      |      |  |
| Chevron       |                    |      |      |      |      |      |      |      | 88.0 |      | 12.0 |      |      |      |      |      |      |      |      |  |
| Gucci         |                    |      |      | 3.9  |      | 2.1  | 13.8 | 20.6 | 10.0 | 1.8  | 6.9  | 0.4  | 9.2  | 1.6  | 8.5  | 11.5 | 8.2  | 1.3  |      |  |
| PetroChina    |                    |      |      |      | 1.0  | 15.8 |      | 49.2 |      |      | 1.2  | 13.2 |      |      | 6.9  | 10.9 |      | 1.8  |      |  |
| easyJet       |                    |      |      | 13.5 |      |      |      | 5.9  |      | 1.8  | 7.0  | 11.0 | 5.0  | 20.9 | 24.7 |      | 5.5  | 4.8  |      |  |
| EY            |                    |      |      | 23.4 |      | 4.1  | 12.4 | 5.7  | 15.3 |      |      | 8.5  | 1.8  | 3.7  | 4.7  | 4.2  | 2.0  | 14.4 |      |  |
| Norwegian CL  |                    |      |      | 29.7 | <0.1 |      | 2.0  | 11.2 | 1.9  | 2.0  | 47.7 | 5.4  |      | <0.1 |      |      |      |      |      |  |
| Yamato        |                    |      |      |      |      |      | 3.9  | 0.0  | 1.1  | 0.4  |      |      | <0.1 | 1.7  | 82.1 | 5.8  | 5.0  |      |      |  |
| Hu-Chems      |                    |      |      |      | 79.6 |      |      |      |      |      | 20.4 |      |      |      |      |      |      |      |      |  |
| Skoda         |                    |      |      |      |      | 2.4  |      | 11.2 | 20.8 |      |      |      | 14.0 |      | 7.6  |      | 13.1 | 14.1 | 16.8 |  |
| All companies | <0.1               | 2.4  | 0.3  | 2.0  | 4.9  | 9.6  | 7.0  | 19.7 | 6.9  | 4.7  | 7.2  | 2.7  | 11.4 | 3.5  | 12.1 | 2.9  | 1.1  | 1.3  | 0.3  |  |

**Fig. S3. Relative share of credits (%) retired by company and by project start year**

Values show the distribution of project start years (i.e. the year a project began issuing credits, measured by the first year of the first crediting period) for all credits sourced by a company over 2020-23. For example, 51.2% of credits retired by Shell came from offset projects that began issuing credits in 2010. Darker colors indicator higher shares. Data excludes credits retired from CDM since this registry does not disclose vintage years on its registry. \*One company (Hu-Chems) has no credits recorded because it sourced all of its credits from CDM.

**Table S5. Mean price estimations (\$) and relative cost category by project type**

|                           | 2020  | Relative cost | 2021 | Relative cost | 2022  | Relative cost | 2023  | Relative cost |
|---------------------------|-------|---------------|------|---------------|-------|---------------|-------|---------------|
| <b>Removal</b>            |       |               |      |               |       |               |       |               |
| Forestry and land use     | 7.90  | ●●●●●         | 7.97 | ●●●●●         | 11.79 | ●●●●●         | 15.60 | ●●●●●         |
| <b>Avoidance</b>          |       |               |      |               |       |               |       |               |
| Agriculture               | 10.30 | ●●●●●         | 9.65 | ●●●●●         | 11.02 | ●●●●●         | 6.43  | ●●●           |
| Chemical processes        | 2.15  | ●●            | 3.12 | ●●            | 5.14  | ●             | 4.69  | ●●            |
| Forestry and land use     | 5.40  | ●●●●●         | 5.15 | ●●●●●         | 10.26 | ●●●●●         | 10.84 | ●●●●●         |
| Household and community   | 4.34  | ●●●           | 5.36 | ●●●           | 8.55  | ●●●           | 7.33  | ●●●           |
| Industrial and commercial | 0.98  | ●             | 2.16 | ●             | 5.39  | ●●            | 3.69  | ●             |
| Renewable energy          | 1.08  | ●             | 2.16 | ●             | 4.16  | ●             | 3.97  | ●             |
| Waste management          | 2.69  | ●●●           | 3.63 | ●●●           | 7.23  | ●●●           | 9.00  | ●●●●          |

Pricing categories are assigned codes based on the price quintile in which each credit type fell. Dots indicate each quintile as follows: ●= 1st quintile (lowest); ●●= 2nd quintile (mid-low); ●●●= 3rd quintile (average); ●●●●= 4th quintile (mid-high); ●●●●●= 5th quintile (highest). Price estimates data were obtained from Ecosystem Marketplace<sup>5</sup>. Due to a slight inconsistency in the offset project categories used by Ecosystem Marketplace and the Berkeley Carbon Trading Project, here we show prices for projects categorised by Ecosystem Marketplace as 'Energy efficiency and fuel switching' in the *Industrial and commercial* category.

|               | 2023  |         |         |          |       | 2022  |         |         |          |      |
|---------------|-------|---------|---------|----------|-------|-------|---------|---------|----------|------|
|               | Q1    | Q2      | Q3      | Q4       | Q5    | Q1    | Q2      | Q3      | Q4       | Q5   |
|               | Low   | Mid-low | Average | Mid-high | High  | Low   | Mid-low | Average | Mid-high | High |
| Shell         | 8.7   |         | 0.8     |          | 90.4  |       |         |         | 93.3     | 6.7  |
| Delta         | 86.0  |         |         |          | 14.0  | 42.8  | 52.7    | 2.8     | 1.5      | 0.2  |
| Volkswagen    | 36.7  |         |         |          | 63.3  | 64.3  |         |         | 35.2     | 0.5  |
| Banco BV      | 0.2   |         | 99.8    |          |       | 83.4  |         | 16.6    |          |      |
| Eni           |       |         |         |          | 100.0 | 6.7   |         |         | 93.3     |      |
| Telstra       | 100.0 |         |         |          | <0.1  | 100.0 |         |         |          |      |
| Audi          | 50.5  |         |         |          | 49.5  | 69.9  |         |         | 2.5      | 27.7 |
| Takeda        | <0.1  |         |         |          | 100.0 | 90.7  |         |         | 9.3      |      |
| Sasol         |       |         |         |          |       | 100.0 |         |         |          |      |
| DPD           |       |         |         |          |       | 83.8  |         | 16.2    |          |      |
| Boeing        | 20.8  | 47.2    |         |          | 32.0  | 100.0 |         |         |          |      |
| Chevron       | 100.0 |         |         |          |       | 72.6  |         | 6.1     | 21.3     |      |
| Gucci         |       |         |         |          |       |       |         |         | 100.0    |      |
| PetroChina    | 2.7   | 4.7     |         |          | 92.6  | 4.5   |         |         | 40.6     | 55.0 |
| easyJet       |       |         | 71.6    |          | 28.4  | 59.0  |         | 24.7    |          | 16.3 |
| EY            | 73.2  |         | 5.4     |          | 21.4  | 59.2  |         | 7.0     | 33.5     | 0.3  |
| Norwegian CL  | 57.1  | 42.9    |         |          | <0.1  | 48.1  | 51.9    |         |          | <0.1 |
| Yamato        | 95.0  |         | 5.0     |          |       |       |         |         |          |      |
| Hu-Chems      |       |         |         |          |       |       |         |         |          |      |
| Skoda         | 77.4  |         |         |          | 22.6  | 52.7  |         |         | 47.3     |      |
| All companies | 32.9  | 3.7     | 4.3     |          | 59.1  | 51.8  | 14.0    | 4.4     | 26.0     | 3.8  |

  

|               | 2021  |         |         |          |      | 2020  |         |         |          |      |
|---------------|-------|---------|---------|----------|------|-------|---------|---------|----------|------|
|               | Q1    | Q2      | Q3      | Q4       | Q5   | Q1    | Q2      | Q3      | Q4       | Q5   |
|               | Low   | Mid-low | Average | Mid-high | High | Low   | Mid-low | Average | Mid-high | High |
| Shell         | 3.0   |         | 87.7    | 0.9      | 8.5  |       |         |         | 93.9     | 6.1  |
| Delta         | 29.5  |         | 70.3    |          | 0.3  | 87.7  |         |         | 11.9     | 0.4  |
| Volkswagen    | 14.0  |         | 77.0    |          | 9.0  | 17.8  |         |         | 82.2     |      |
| Banco BV      | 47.8  |         | 48.8    |          | 3.4  |       |         |         |          |      |
| Eni           | 44.3  |         | 55.7    |          |      |       |         |         | 100.0    |      |
| Telstra       | 100.0 |         | <0.1    |          |      | 100.0 |         |         |          |      |
| Audi          | 5.3   |         | 94.7    |          |      | 10.4  |         | 89.6    |          |      |
| Takeda        |       |         | 84.0    | 5.6      | 10.4 | 49.7  |         | 9.5     | 40.8     |      |
| Sasol         | 10.8  | 87.0    | 2.2     |          |      | 13.7  | 86.3    |         |          |      |
| DPD           | 77.3  |         | 22.7    |          |      | 75.7  |         | 24.3    |          |      |
| Boeing        | 74.6  |         | 17.4    | 3.1      | 4.9  | 78.2  |         | 3.6     | 7.5      | 10.7 |
| Chevron       | 49.4  |         | 50.4    |          | 0.2  |       |         |         | 100.0    |      |
| Gucci         |       |         | 100.0   |          |      |       |         |         | 100.0    |      |
| PetroChina    |       |         | 70.0    |          | 30.0 |       |         |         |          |      |
| easyJet       |       |         |         |          |      |       |         |         |          |      |
| EY            | 11.3  |         | 75.3    |          | 13.4 | 19.6  |         |         | 80.4     |      |
| Norwegian CL  | 99.8  |         |         | 0.1      | <0.1 |       |         |         |          |      |
| Yamato        |       |         |         |          |      |       |         |         |          |      |
| Hu-Chems      |       | 100.0   |         |          |      |       | 100.0   |         |          |      |
| Skoda         | 65.3  |         | 34.7    |          |      |       |         |         |          |      |
| All companies | 30.4  | 6.0     | 60.0    | 0.2      | 3.4  | 39.4  | 12.1    | 3.6     | 43.5     | 1.4  |

**Fig. S4. Share of credits (%) retired by price category by year**

The relative share of credits retired by each company, organised into five quintiles. Each reflects the average estimated price of eight types of offset projects contained in our database relative to the price of other offset types (see Table S5). Price estimates data were obtained from Ecosystem Marketplace<sup>5</sup>.

|                           | Vintage year |      |      |      |      |      |      |      |      |      |      |      |      |      |      |      |      |
|---------------------------|--------------|------|------|------|------|------|------|------|------|------|------|------|------|------|------|------|------|
|                           | 2006         | 2007 | 2008 | 2009 | 2010 | 2011 | 2012 | 2013 | 2014 | 2015 | 2016 | 2017 | 2018 | 2019 | 2020 | 2021 | 2022 |
| <b>Removal</b>            |              |      |      |      |      |      |      |      |      |      |      |      |      |      |      |      |      |
| Forestry and land use     |              |      |      |      | 1.5  | 8.3  | 7.6  | 5.0  | 39.6 |      |      | 6.9  | 5.5  | 8.7  | 11.2 | 5.6  |      |
| <b>Avoidance</b>          |              |      |      |      |      |      |      |      |      |      |      |      |      |      |      |      |      |
| Agriculture               |              |      |      |      |      |      |      | 0.6  |      |      |      |      | 25.7 | 29.8 | 26.1 | 17.7 |      |
| Chemical processes        |              | 2.9  | 50.6 | 3.7  | 2.4  | 5.7  | 15.8 | 0.7  | 14.3 | 0.9  | 1.9  | 1.0  |      |      |      |      |      |
| Forestry and land use     |              |      | 3.9  |      | 14.6 | 0.3  | 4.3  | 8.9  | 6.5  | 12.5 | 9.6  | 11.1 | 11.7 | 11.1 | 4.8  | 0.5  |      |
| Household and community   |              |      |      |      |      |      | 2.7  | 1.9  | 1.7  | 24.8 | 12.9 | 20.2 | 15.1 | 12.0 | 4.7  | 2.2  | 1.8  |
| Industrial and commercial |              |      |      |      |      |      |      | 9.3  | 20.6 | 11.0 | 40.5 | 1.1  | 1.0  | 8.2  | 8.1  | 0.2  |      |
| Renewable energy          | 0.2          | 0.8  |      | 0.1  |      | 1.8  | 1.4  | 3.0  | 3.8  | 4.2  | 6.5  | 7.1  | 16.4 | 20.7 | 17.3 | 15.7 | 1.1  |
| Waste management          |              | 53.3 |      | 1.1  |      |      |      | 0.5  | 7.8  | 1.0  | 17.9 | 0.7  | 4.0  | 10.4 | 3.1  |      |      |

**Fig. S5. Relative share of credits (%) retired in each project category by vintage year**

Values show the distribution of vintage years (i.e. the year that an emissions reduction activity occurred) for all credits sourced by all twenty companies over 2020-23. Results show that, for example, 50.6% of credits sourced from offset projects in the *Chemical processes* category had a vintage year of 2008. Data excludes credits retired from CDM since this registry does not disclose vintage years. Darker colors indicator higher shares.

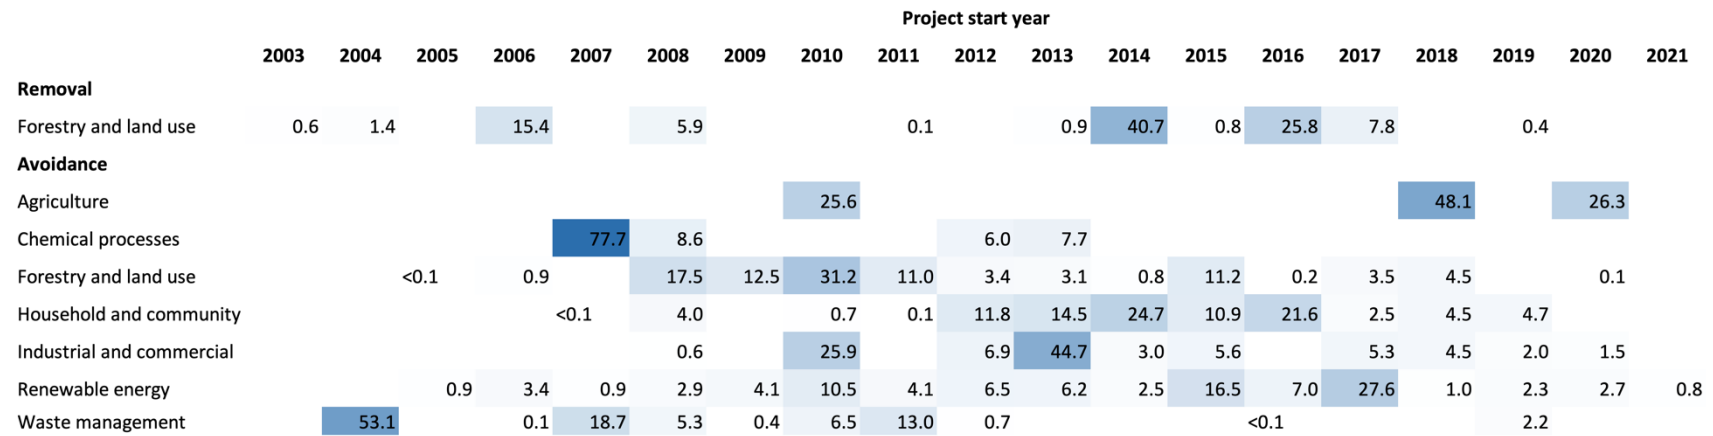

**Fig. S6. Relative share of credits (%) retired in each project category by project start year**

Values show the distribution of project start years (i.e. the year a project began issuing credits, measured by the first year of the first crediting period) for all credits sourced by all twenty companies over 2020-23. For example, 77.7% of credits in the *Chemical processes* category came from offset projects that began issuing credits in 2007. Darker colors indicator higher shares.



**Table S6. Absolute share (%) of retirement volumes by offset type**

|                                              | Q1    | Q2    | Q3     | Q4     | Q5     |
|----------------------------------------------|-------|-------|--------|--------|--------|
| Quintile lowest value (t CO <sub>2</sub> e)  | Min   | 2,750 | 8,354  | 25,000 | 77,192 |
| Quintile highest value (t CO <sub>2</sub> e) | 2,750 | 8,354 | 25,000 | 77,192 | Max    |
| <b>Removal</b>                               |       |       |        |        |        |
| Forestry and land use                        | 0.02  | 0.04  | 0.31   | 1.00   | 1.15   |
| <b>Avoidance</b>                             |       |       |        |        |        |
| Agriculture                                  | 0.00  | 0.01  | 0.02   | 0.41   | 0.09   |
| Chemical processes                           | 0.01  | 0.10  | 0.13   | 0.31   | 4.27   |
| Forestry and land use                        | 0.10  | 0.35  | 1.14   | 3.83   | 38.43  |
| Household and community                      | 0.01  | 0.15  | 0.30   | 0.25   | 0.22   |
| Industrial and commercial                    | 0.01  | 0.03  | 0.16   | 0.87   | 5.67   |
| Renewable energy                             | 0.08  | 0.35  | 2.16   | 6.26   | 27.27  |
| Waste management                             | 0.01  | 0.03  | 0.13   | 0.16   | 4.15   |

The absolute share (%) of retirement volumes by offset type, organised into quintiles. Results show that 38.43% of all credits retired came from *Forestry and land-use projects* (avoidance) projects and were obtained in transactions sized 77,192 tCO<sub>2</sub>e or higher.

**Table S7. Relative share (%) of all renewable energy credits retired by country**

| Country              | Solar (C)    | Solar (D)   | Wind         | Geo         | Biomass     | Hydro        | Bundled     | Total         |
|----------------------|--------------|-------------|--------------|-------------|-------------|--------------|-------------|---------------|
| Brazil               | 0.00         | 0.00        | 2.85         | 0.00        | 4.61        | 7.15         | 0.00        | 14.61         |
| Bulgaria             | 0.00         | 0.00        | 0.23         | 0.00        | 0.13        | 0.00         | 0.00        | 0.36          |
| Chile                | 0.00         | 0.00        | 0.00         | 0.00        | 0.21        | 0.00         | 0.00        | 0.21          |
| China                | 0.08         | 0.08        | 8.93         | 2.29        | 2.11        | 2.08         | 0.00        | 15.58         |
| Colombia             | 0.00         | 0.00        | 0.00         | 0.00        | 0.00        | 2.85         | 0.00        | 2.85          |
| Dominican R.         | 0.00         | 0.00        | 1.10         | 0.00        | 0.00        | 0.00         | 0.00        | 1.10          |
| El Salvador          | 0.00         | 0.00        | 0.00         | 0.71        | 0.00        | 0.00         | 0.00        | 0.71          |
| Guatemala            | 0.00         | 0.00        | 0.42         | 0.00        | 0.00        | 0.00         | 0.00        | 0.42          |
| India                | 28.48        | 3.22        | 21.35        | 0.00        | 0.02        | 0.74         | 0.44        | 54.25         |
| Indonesia            | 0.00         | 0.00        | 0.07         | 0.44        | 0.00        | 0.62         | 0.00        | 1.13          |
| Jamaica              | 0.00         | 0.00        | 0.17         | 0.00        | 0.00        | 0.00         | 0.00        | 0.17          |
| Mauritania           | 0.00         | 0.00        | 0.02         | 0.00        | 0.00        | 0.00         | 0.00        | 0.02          |
| Mauritius            | 0.00         | 0.00        | 0.00         | 0.00        | 0.00        | 0.00         | 0.00        | 0.00          |
| Namibia              | 0.05         | 0.00        | 0.00         | 0.00        | 0.00        | 0.00         | 0.00        | 0.05          |
| Nicaragua            | 0.00         | 0.00        | 1.30         | 0.07        | 0.00        | 0.00         | 0.00        | 1.37          |
| Pakistan             | 0.00         | 0.00        | 0.29         | 0.00        | 0.00        | 0.00         | 0.00        | 0.29          |
| Philippines          | 0.19         | 0.00        | 0.00         | 0.00        | 0.00        | 0.00         | 0.00        | 0.19          |
| South Korea          | 0.00         | 0.00        | 0.00         | 0.00        | 0.00        | 0.00         | 0.00        | 0.00          |
| South Africa         | 0.00         | 0.00        | 0.00         | 0.00        | 0.08        | 0.00         | 0.00        | 0.08          |
| Taiwan               | 0.00         | 0.00        | 0.35         | 0.00        | 0.00        | 0.00         | 0.00        | 0.35          |
| Thailand             | 0.00         | 0.00        | 0.10         | 0.00        | 0.62        | 0.00         | 0.00        | 0.72          |
| Turkey               | 0.00         | 0.00        | 2.42         | 0.00        | 0.00        | 2.09         | 0.00        | 4.51          |
| Uganda               | 0.00         | 0.00        | 0.00         | 0.00        | 0.00        | 0.20         | 0.00        | 0.20          |
| United States        | 0.00         | 0.00        | 0.10         | 0.00        | 0.00        | 0.00         | 0.00        | 0.10          |
| Uruguay              | 0.00         | 0.00        | 0.03         | 0.00        | 0.00        | 0.00         | 0.00        | 0.03          |
| Vietnam              | 0.68         | 0.00        | 0.00         | 0.00        | 0.00        | 0.02         | 0.00        | 0.70          |
| <b>All countries</b> | <b>29.49</b> | <b>3.30</b> | <b>39.74</b> | <b>3.50</b> | <b>7.78</b> | <b>15.74</b> | <b>0.44</b> | <b>100.00</b> |

Solar (C) = centralized. Solar (D) = distributed. Geo = geothermal. Table shows the relative volume of renewable energy credits retired by all twenty companies from each country. For example, 4.61% of all renewable energy credits came from biomass projects based on Brazil.

Project start year (start of first crediting period)

|                     | 2005    | 2006    | 2007   | 2008 | 2009    | 2010      | 2011    | 2012    | 2013    | 2014    | 2015      | 2016      | 2017    | 2018 | 2019  | 2020    | 2021    | Total            | Meet criteria    | Share (%)    |   |
|---------------------|---------|---------|--------|------|---------|-----------|---------|---------|---------|---------|-----------|-----------|---------|------|-------|---------|---------|------------------|------------------|--------------|---|
| <b>Brazil</b>       |         |         |        |      |         |           |         |         |         |         |           |           |         |      |       |         |         |                  |                  |              |   |
| Solar               | 0       | 0       | 0      | 0    | 0       | 0         | 0       | 0       | 0       | 0       | 0         | 0         | 0       | 0    | 0     | 0       | 0       | 0                | 0                | -            | - |
| Wind                | 0       | 0       | 0      | 0    | 0       | 0         | 0       | 0       | 0       | 369,500 | 0         | 501,007   | 510,682 | 0    | 0     | 0       | 0       | 1,381,189        | 0                | 0.00         |   |
| Geothermal          | 0       | 0       | 0      | 0    | 0       | 0         | 0       | 0       | 0       | 0       | 0         | 0         | 0       | 0    | 0     | 0       | 0       | 0                | -                | -            |   |
| Biomass             | 0       | 0       | 2,757  | 0    | 0       | 0         | 0       | 0       | 0       | 0       | 2,200,000 | 0         | 30,000  | 0    | 0     | 0       | 0       | 2,232,757        | 0                | 0.00         |   |
| Hydro               | 0       | 472,882 | 0      | 0    | 0       | 17        | 0       | 0       | 0       | 0       | 2,989,398 | 0         | 0       | 0    | 0     | 0       | 0       | 3,462,297        | 0                | 0.00         |   |
|                     |         |         |        |      |         |           |         |         |         |         |           |           |         |      |       |         |         | <b>7,076,243</b> | <b>0</b>         | <b>0.00</b>  |   |
| <b>Bulgaria</b>     |         |         |        |      |         |           |         |         |         |         |           |           |         |      |       |         |         |                  |                  |              |   |
| Solar               | 0       | 0       | 0      | 0    | 0       | 0         | 0       | 0       | 0       | 0       | 0         | 0         | 0       | 0    | 0     | 0       | 0       | 0                | -                | -            |   |
| Wind                | 0       | 0       | 0      | 0    | 0       | 0         | 0       | 110,000 | 0       | 0       | 0         | 0         | 0       | 0    | 0     | 0       | 0       | 110,000          | 0                | 0.00         |   |
| Geothermal          | 0       | 0       | 0      | 0    | 0       | 0         | 0       | 0       | 0       | 0       | 0         | 0         | 0       | 0    | 0     | 0       | 0       | 0                | -                | -            |   |
| Biomass             | 0       | 0       | 0      | 0    | 0       | 0         | 0       | 0       | 64,693  | 0       | 0         | 0         | 0       | 0    | 0     | 0       | 0       | 64,693           | 0                | 0.00         |   |
| Hydro               | 0       | 0       | 0      | 0    | 0       | 0         | 0       | 0       | 0       | 0       | 0         | 0         | 0       | 0    | 0     | 0       | 0       | 0                | -                | -            |   |
|                     |         |         |        |      |         |           |         |         |         |         |           |           |         |      |       |         |         | <b>174,693</b>   | <b>0</b>         | <b>0.00</b>  |   |
| <b>China</b>        |         |         |        |      |         |           |         |         |         |         |           |           |         |      |       |         |         |                  |                  |              |   |
| Solar               | 0       | 0       | 0      | 0    | 0       | 0         | 0       | 0       | 80,037  | 0       | 0         | 0         | 0       | 0    | 0     | 0       | 0       | 80,037           | 0                | 0.00         |   |
| Wind                | 0       | 0       | 0      | 0    | 949,031 | 2,452,684 | 557,555 | 0       | 176,508 | 0       | 189,905   | 0         | 0       | 0    | 0     | 0       | 0       | 4,325,683        | 949,031          | 21.94        |   |
| Geothermal          | 0       | 0       | 0      | 0    | 0       | 0         | 0       | 0       | 0       | 0       | 0         | 0         | 0       | 0    | 0     | 704,007 | 407,822 | 1,111,829        | 0                | 0.00         |   |
| Biomass             | 125,679 | 0       | 0      | 0    | 0       | 4,405     | 206,154 | 70,000  | 0       | 0       | 0         | 0         | 0       | 0    | 1,000 | 614,192 | 0       | 1,021,430        | 125,679          | 12.30        |   |
| Hydro               | 0       | 483,549 | 32,098 | 0    | 0       | 0         | 0       | 0       | 491,675 | 0       | 0         | 0         | 0       | 0    | 0     | 0       | 0       | 1,007,322        | 0                | 0.00         |   |
|                     |         |         |        |      |         |           |         |         |         |         |           |           |         |      |       |         |         | <b>7,546,301</b> | <b>1,074,710</b> | <b>14.24</b> |   |
| <b>Colombia</b>     |         |         |        |      |         |           |         |         |         |         |           |           |         |      |       |         |         |                  |                  |              |   |
| Solar               | 0       | 0       | 0      | 0    | 0       | 0         | 0       | 0       | 0       | 0       | 0         | 0         | 0       | 0    | 0     | 0       | 0       | 0                | -                | -            |   |
| Wind                | 0       | 0       | 0      | 0    | 0       | 0         | 0       | 0       | 0       | 0       | 0         | 0         | 0       | 0    | 0     | 0       | 0       | 0                | -                | -            |   |
| Geothermal          | 0       | 0       | 0      | 0    | 0       | 0         | 0       | 0       | 0       | 0       | 0         | 0         | 0       | 0    | 0     | 0       | 0       | 0                | -                | -            |   |
| Biomass             | 0       | 0       | 0      | 0    | 0       | 0         | 0       | 0       | 0       | 0       | 0         | 0         | 0       | 0    | 0     | 0       | 0       | 0                | -                | -            |   |
| Hydro               | 0       | 0       | 0      | 0    | 0       | 0         | 0       | 53,225  | 0       | 0       | 5,300     | 1,322,732 | 0       | 0    | 0     | 0       | 0       | 1,381,257        | 0                | 0.00         |   |
|                     |         |         |        |      |         |           |         |         |         |         |           |           |         |      |       |         |         | <b>1,381,257</b> | <b>0</b>         | <b>0.00</b>  |   |
| <b>Dominican R.</b> |         |         |        |      |         |           |         |         |         |         |           |           |         |      |       |         |         |                  |                  |              |   |
| Solar               | 0       | 0       | 0      | 0    | 0       | 0         | 0       | 0       | 0       | 0       | 0         | 0         | 0       | 0    | 0     | 0       | 0       | 0                | -                | -            |   |
| Wind                | 0       | 0       | 0      | 0    | 0       | 0         | 0       | 0       | 534,806 | 0       | 0         | 0         | 0       | 0    | 0     | 0       | 0       | 534,806          | 0                | 0.00         |   |
| Geothermal          | 0       | 0       | 0      | 0    | 0       | 0         | 0       | 0       | 0       | 0       | 0         | 0         | 0       | 0    | 0     | 0       | 0       | 0                | -                | -            |   |
| Biomass             | 0       | 0       | 0      | 0    | 0       | 0         | 0       | 0       | 0       | 0       | 0         | 0         | 0       | 0    | 0     | 0       | 0       | 0                | -                | -            |   |
| Hydro               | 0       | 0       | 0      | 0    | 0       | 0         | 0       | 0       | 0       | 0       | 0         | 0         | 0       | 0    | 0     | 0       | 0       | 0                | -                | -            |   |
|                     |         |         |        |      |         |           |         |         |         |         |           |           |         |      |       |         |         | <b>534,806</b>   | <b>0</b>         | <b>0.00</b>  |   |

| El Salvador | 2005 | 2006    | 2007    | 2008      | 2009    | 2010      | 2011      | 2012      | 2013      | 2014    | 2015      | 2016    | 2017       | 2018    | 2019    | 2020 | 2021 | Total      | Meet criteria | Share (%) |
|-------------|------|---------|---------|-----------|---------|-----------|-----------|-----------|-----------|---------|-----------|---------|------------|---------|---------|------|------|------------|---------------|-----------|
| Solar       | 0    | 0       | 0       | 0         | 0       | 0         | 0         | 0         | 0         | 0       | 0         | 0       | 0          | 0       | 0       | 0    | 0    | 0          | -             | -         |
| Wind        | 0    | 0       | 0       | 0         | 0       | 0         | 0         | 0         | 0         | 0       | 0         | 0       | 0          | 0       | 0       | 0    | 0    | 0          | -             | -         |
| Geothermal  | 0    | 0       | 342,500 | 0         | 0       | 0         | 0         | 0         | 0         | 0       | 0         | 0       | 0          | 0       | 0       | 0    | 0    | 342,500    | 0             | 0.00      |
| Biomass     | 0    | 0       | 0       | 0         | 0       | 0         | 0         | 0         | 0         | 0       | 0         | 0       | 0          | 0       | 0       | 0    | 0    | 0          | -             | -         |
| Hydro       | 0    | 0       | 0       | 0         | 0       | 0         | 0         | 0         | 0         | 0       | 0         | 0       | 0          | 0       | 0       | 0    | 0    | 0          | -             | -         |
|             |      |         |         |           |         |           |           |           |           |         |           |         |            |         |         |      |      | 342,500    | 0             | 0.00      |
| Guatemala   | 2005 | 2006    | 2007    | 2008      | 2009    | 2010      | 2011      | 2012      | 2013      | 2014    | 2015      | 2016    | 2017       | 2018    | 2019    | 2020 | 2021 | Total      | Meet criteria | Share (%) |
| Solar       | 0    | 0       | 0       | 0         | 0       | 0         | 0         | 0         | 0         | 0       | 0         | 0       | 0          | 0       | 0       | 0    | 0    | 0          | -             | -         |
| Wind        | 0    | 0       | 0       | 0         | 0       | 0         | 0         | 0         | 0         | 0       | 203,000   | 0       | 0          | 0       | 0       | 0    | 0    | 203,000    | 203,000       | 100.00    |
| Geothermal  | 0    | 0       | 0       | 0         | 0       | 0         | 0         | 0         | 0         | 0       | 0         | 0       | 0          | 0       | 0       | 0    | 0    | 0          | -             | -         |
| Biomass     | 0    | 0       | 0       | 0         | 0       | 0         | 0         | 0         | 0         | 0       | 0         | 0       | 0          | 0       | 0       | 0    | 0    | 0          | -             | -         |
| Hydro       | 0    | 0       | 0       | 0         | 0       | 0         | 0         | 0         | 0         | 0       | 0         | 0       | 0          | 0       | 0       | 0    | 0    | 0          | -             | -         |
|             |      |         |         |           |         |           |           |           |           |         |           |         |            |         |         |      |      | 203,000    | 203,000       | 100.00    |
| India       | 2005 | 2006    | 2007    | 2008      | 2009    | 2010      | 2011      | 2012      | 2013      | 2014    | 2015      | 2016    | 2017       | 2018    | 2019    | 2020 | 2021 | Total      | Meet criteria | Share (%) |
| Solar       | 0    | 0       | 0       | 0         | 0       | 0         | 0         | 0         | 68,000    | 0       | 1,629,204 | 898,049 | 12,283,580 | 218,564 | 260,120 | 0    | 0    | 15,357,517 | 14,878,833    | 96.88     |
| Wind        | 0    | 157,515 | 78,408  | 1,286,374 | 678,882 | 1,440,662 | 1,093,431 | 2,464,679 | 1,321,474 | 362,685 | 320,599   | 247,980 | 253,713    | 129,405 | 508,357 | 0    | 0    | 10,344,164 | 235,923       | 2.28      |
| Geothermal  | 0    | 0       | 0       | 0         | 0       | 0         | 0         | 0         | 0         | 0       | 0         | 0       | 0          | 0       | 0       | 0    | 0    | 0          | -             | -         |
| Biomass     | 0    | 0       | 0       | 0         | 9,051   | 0         | 0         | 0         | 0         | 0       | 0         | 0       | 0          | 0       | 0       | 0    | 0    | 9,051      | 9,051         | 100.00    |
| Hydro       | 0    | 28,753  | 0       | 0         | 0       | 150,000   | 0         | 0         | 94,000    | 83,891  | 0         | 0       | 0          | 0       | 0       | 0    | 0    | 356,644    | 0             | 0.00      |
|             |      |         |         |           |         |           |           |           |           |         |           |         |            |         |         |      |      | 26,067,376 | 15,123,807    | 58.02     |
| Indonesia   | 2005 | 2006    | 2007    | 2008      | 2009    | 2010      | 2011      | 2012      | 2013      | 2014    | 2015      | 2016    | 2017       | 2018    | 2019    | 2020 | 2021 | Total      | Meet criteria | Share (%) |
| Solar       | 0    | 0       | 0       | 0         | 0       | 0         | 0         | 0         | 0         | 0       | 0         | 0       | 0          | 0       | 0       | 0    | 0    | 0          | -             | -         |
| Wind        | 0    | 0       | 0       | 0         | 0       | 0         | 0         | 35,000    | 0         | 0       | 0         | 0       | 0          | 0       | 0       | 0    | 0    | 35,000     | 35,000        | 100.00    |
| Geothermal  | 0    | 211,000 | 0       | 0         | 0       | 0         | 0         | 0         | 0         | 0       | 0         | 0       | 0          | 0       | 0       | 0    | 0    | 211,000    | 211,000       | 100.00    |
| Biomass     | 0    | 0       | 0       | 0         | 0       | 0         | 0         | 0         | 0         | 0       | 0         | 0       | 0          | 0       | 0       | 0    | 0    | 0          | -             | -         |
| Hydro       | 0    | 302,240 | 0       | 0         | 0       | 0         | 0         | 0         | 0         | 0       | 0         | 0       | 0          | 0       | 0       | 0    | 0    | 302,240    | 0             | 0.00      |
|             |      |         |         |           |         |           |           |           |           |         |           |         |            |         |         |      |      | 548,240    | 246,000       | 44.87     |
| Jamacia     | 2005 | 2006    | 2007    | 2008      | 2009    | 2010      | 2011      | 2012      | 2013      | 2014    | 2015      | 2016    | 2017       | 2018    | 2019    | 2020 | 2021 | Total      | Meet criteria | Share (%) |
| Solar       | 0    | 0       | 0       | 0         | 0       | 0         | 0         | 0         | 0         | 0       | 0         | 0       | 0          | 0       | 0       | 0    | 0    | 0          | -             | -         |
| Wind        | 0    | 0       | 0       | 0         | 0       | 0         | 0         | 83,946    | 0         | 0       | 0         | 0       | 0          | 0       | 0       | 0    | 0    | 83,946     | 0             | 0.00      |
| Geothermal  | 0    | 0       | 0       | 0         | 0       | 0         | 0         | 0         | 0         | 0       | 0         | 0       | 0          | 0       | 0       | 0    | 0    | 0          | -             | -         |
| Biomass     | 0    | 0       | 0       | 0         | 0       | 0         | 0         | 0         | 0         | 0       | 0         | 0       | 0          | 0       | 0       | 0    | 0    | 0          | -             | -         |
| Hydro       | 0    | 0       | 0       | 0         | 0       | 0         | 0         | 0         | 0         | 0       | 0         | 0       | 0          | 0       | 0       | 0    | 0    | 0          | -             | -         |
|             |      |         |         |           |         |           |           |           |           |         |           |         |            |         |         |      |      | 83,946     | 0             | 0.00      |

| <b>Mauritania</b>  | 2005   | 2006 | 2007 | 2008 | 2009 | 2010    | 2011 | 2012    | 2013    | 2014 | 2015 | 2016   | 2017   | 2018 | 2019 | 2020 | 2021 | Total          | Meet criteria  | Share (%)     |
|--------------------|--------|------|------|------|------|---------|------|---------|---------|------|------|--------|--------|------|------|------|------|----------------|----------------|---------------|
| Solar              | 0      | 0    | 0    | 0    | 0    | 0       | 0    | 0       | 0       | 0    | 0    | 0      | 0      | 0    | 0    | 0    | 0    | 0              | -              | -             |
| Wind               | 0      | 0    | 0    | 0    | 0    | 0       | 0    | 0       | 0       | 0    | 0    | 10,000 | 0      | 0    | 0    | 0    | 0    | 10,000         | 0              | 0.00          |
| Geothermal         | 0      | 0    | 0    | 0    | 0    | 0       | 0    | 0       | 0       | 0    | 0    | 0      | 0      | 0    | 0    | 0    | 0    | 0              | -              | -             |
| Biomass            | 0      | 0    | 0    | 0    | 0    | 0       | 0    | 0       | 0       | 0    | 0    | 0      | 0      | 0    | 0    | 0    | 0    | 0              | -              | -             |
| Hydro              | 0      | 0    | 0    | 0    | 0    | 0       | 0    | 0       | 0       | 0    | 0    | 0      | 0      | 0    | 0    | 0    | 0    | 0              | -              | -             |
|                    |        |      |      |      |      |         |      |         |         |      |      |        |        |      |      |      |      | <b>10,000</b>  | <b>0</b>       | <b>0.00</b>   |
| <b>Namibia</b>     | 2005   | 2006 | 2007 | 2008 | 2009 | 2010    | 2011 | 2012    | 2013    | 2014 | 2015 | 2016   | 2017   | 2018 | 2019 | 2020 | 2021 | Total          | Meet criteria  | Share (%)     |
| Solar              | 0      | 0    | 0    | 0    | 0    | 0       | 0    | 0       | 0       | 0    | 0    | 0      | 25,000 | 0    | 0    | 0    | 0    | 25,000         | 0              | 0.00          |
| Wind               | 0      | 0    | 0    | 0    | 0    | 0       | 0    | 0       | 0       | 0    | 0    | 0      | 0      | 0    | 0    | 0    | 0    | 0              | -              | -             |
| Geothermal         | 0      | 0    | 0    | 0    | 0    | 0       | 0    | 0       | 0       | 0    | 0    | 0      | 0      | 0    | 0    | 0    | 0    | 0              | -              | -             |
| Biomass            | 0      | 0    | 0    | 0    | 0    | 0       | 0    | 0       | 0       | 0    | 0    | 0      | 0      | 0    | 0    | 0    | 0    | 0              | -              | -             |
| Hydro              | 0      | 0    | 0    | 0    | 0    | 0       | 0    | 0       | 0       | 0    | 0    | 0      | 0      | 0    | 0    | 0    | 0    | 0              | -              | -             |
|                    |        |      |      |      |      |         |      |         |         |      |      |        |        |      |      |      |      | <b>25,000</b>  | <b>0</b>       | <b>0.00</b>   |
| <b>Nicaragua</b>   | 2005   | 2006 | 2007 | 2008 | 2009 | 2010    | 2011 | 2012    | 2013    | 2014 | 2015 | 2016   | 2017   | 2018 | 2019 | 2020 | 2021 | Total          | Meet criteria  | Share (%)     |
| Solar              | 0      | 0    | 0    | 0    | 0    | 0       | 0    | 0       | 0       | 0    | 0    | 0      | 0      | 0    | 0    | 0    | 0    | 0              | -              | -             |
| Wind               | 0      | 0    | 0    | 0    | 0    | 529,000 | 0    | 100,000 | 0       | 0    | 0    | 0      | 0      | 0    | 0    | 0    | 0    | 629,000        | 0              | 0.00          |
| Geothermal         | 32,500 | 0    | 0    | 0    | 0    | 0       | 0    | 0       | 0       | 0    | 0    | 0      | 0      | 0    | 0    | 0    | 0    | 32,500         | 32,500         | 100.00        |
| Biomass            | 0      | 0    | 0    | 0    | 0    | 0       | 0    | 0       | 0       | 0    | 0    | 0      | 0      | 0    | 0    | 0    | 0    | 0              | -              | -             |
| Hydro              | 0      | 0    | 0    | 0    | 0    | 0       | 0    | 0       | 0       | 0    | 0    | 0      | 0      | 0    | 0    | 0    | 0    | 0              | -              | -             |
|                    |        |      |      |      |      |         |      |         |         |      |      |        |        |      |      |      |      | <b>661,500</b> | <b>32,500</b>  | <b>4.91</b>   |
| <b>Pakistan</b>    | 2005   | 2006 | 2007 | 2008 | 2009 | 2010    | 2011 | 2012    | 2013    | 2014 | 2015 | 2016   | 2017   | 2018 | 2019 | 2020 | 2021 | Total          | Meet criteria  | Share (%)     |
| Solar              | 0      | 0    | 0    | 0    | 0    | 0       | 0    | 0       | 0       | 0    | 0    | 0      | 0      | 0    | 0    | 0    | 0    | 0              | -              | -             |
| Wind               | 0      | 0    | 0    | 0    | 0    | 0       | 0    | 0       | 141,433 | 0    | 0    | 0      | 0      | 0    | 0    | 0    | 0    | 141,433        | 141,433        | 100.00        |
| Geothermal         | 0      | 0    | 0    | 0    | 0    | 0       | 0    | 0       | 0       | 0    | 0    | 0      | 0      | 0    | 0    | 0    | 0    | 0              | -              | -             |
| Biomass            | 0      | 0    | 0    | 0    | 0    | 0       | 0    | 0       | 0       | 0    | 0    | 0      | 0      | 0    | 0    | 0    | 0    | 0              | -              | -             |
| Hydro              | 0      | 0    | 0    | 0    | 0    | 0       | 0    | 0       | 0       | 0    | 0    | 0      | 0      | 0    | 0    | 0    | 0    | 0              | -              | -             |
|                    |        |      |      |      |      |         |      |         |         |      |      |        |        |      |      |      |      | <b>141,433</b> | <b>141,433</b> | <b>100.00</b> |
| <b>Philippines</b> | 2005   | 2006 | 2007 | 2008 | 2009 | 2010    | 2011 | 2012    | 2013    | 2014 | 2015 | 2016   | 2017   | 2018 | 2019 | 2020 | 2021 | Total          | Meet criteria  | Share (%)     |
| Solar              | 0      | 0    | 0    | 0    | 0    | 0       | 0    | 0       | 0       | 0    | 0    | 92,338 | 0      | 0    | 0    | 0    | 0    | 92,338         | 92,338         | 100.00        |
| Wind               | 0      | 0    | 0    | 0    | 0    | 0       | 0    | 0       | 0       | 0    | 0    | 0      | 0      | 0    | 0    | 0    | 0    | 0              | -              | -             |
| Geothermal         | 0      | 0    | 0    | 0    | 0    | 0       | 0    | 0       | 0       | 0    | 0    | 0      | 0      | 0    | 0    | 0    | 0    | 0              | -              | -             |
| Biomass            | 0      | 0    | 0    | 0    | 0    | 0       | 0    | 0       | 0       | 0    | 0    | 0      | 0      | 0    | 0    | 0    | 0    | 0              | -              | -             |
| Hydro              | 0      | 0    | 0    | 0    | 0    | 0       | 0    | 0       | 0       | 0    | 0    | 0      | 0      | 0    | 0    | 0    | 0    | 0              | -              | -             |
|                    |        |      |      |      |      |         |      |         |         |      |      |        |        |      |      |      |      | <b>92,338</b>  | <b>92,338</b>  | <b>100.00</b> |

| Thailand   | 2005    | 2006 | 2007 | 2008 | 2009 | 2010 | 2011 | 2012 | 2013 | 2014 | 2015 | 2016 | 2017 | 2018   | 2019   | 2020 | 2021 | Total   | Meet criteria | Share (%) |
|------------|---------|------|------|------|------|------|------|------|------|------|------|------|------|--------|--------|------|------|---------|---------------|-----------|
| Solar      | 0       | 0    | 0    | 0    | 0    | 0    | 0    | 0    | 0    | 0    | 0    | 0    | 0    | 0      | 0      | 0    | 0    | 0       | -             | -         |
| Wind       | 0       | 0    | 0    | 0    | 0    | 0    | 0    | 0    | 0    | 0    | 0    | 0    | 0    | 30,479 | 19,521 | 0    | 0    | 50,000  | 0             | 0.00      |
| Geothermal | 0       | 0    | 0    | 0    | 0    | 0    | 0    | 0    | 0    | 0    | 0    | 0    | 0    | 0      | 0      | 0    | 0    | 0       | -             | -         |
| Biomass    | 300,000 | 0    | 0    | 0    | 0    | 0    | 0    | 0    | 0    | 0    | 0    | 0    | 0    | 0      | 0      | 0    | 0    | 300,000 | 300,000       | 100.00    |
| Hydro      | 0       | 0    | 0    | 0    | 0    | 0    | 0    | 0    | 0    | 0    | 0    | 0    | 0    | 0      | 0      | 0    | 0    | 0       | -             | -         |
|            |         |      |      |      |      |      |      |      |      |      |      |      |      |        |        |      |      | 350,000 | 300,000       | 85.71     |

  

| Uganda     | 2005 | 2006 | 2007 | 2008 | 2009  | 2010 | 2011 | 2012 | 2013 | 2014 | 2015 | 2016 | 2017 | 2018 | 2019 | 2020 | 2021 | Total  | Meet criteria | Share (%) |
|------------|------|------|------|------|-------|------|------|------|------|------|------|------|------|------|------|------|------|--------|---------------|-----------|
| Solar      | 0    | 0    | 0    | 0    | 0     | 0    | 0    | 0    | 0    | 0    | 0    | 0    | 0    | 0    | 0    | 0    | 0    | 0      | -             | -         |
| Wind       | 0    | 0    | 0    | 0    | 0     | 0    | 0    | 0    | 0    | 0    | 0    | 0    | 0    | 0    | 0    | 0    | 0    | 0      | -             | -         |
| Geothermal | 0    | 0    | 0    | 0    | 0     | 0    | 0    | 0    | 0    | 0    | 0    | 0    | 0    | 0    | 0    | 0    | 0    | 0      | -             | -         |
| Biomass    | 0    | 0    | 0    | 0    | 0     | 0    | 0    | 0    | 0    | 0    | 0    | 0    | 0    | 0    | 0    | 0    | 0    | 0      | -             | -         |
| Hydro      | 0    | 0    | 0    | 0    | 96000 | 0    | 0    | 0    | 0    | 0    | 0    | 0    | 0    | 0    | 0    | 0    | 0    | 96,000 | 0             | 0.00      |
|            |      |      |      |      |       |      |      |      |      |      |      |      |      |      |      |      |      | 96,000 | 0             | 0.00      |

  

| Uruguay    | 2005 | 2006 | 2007 | 2008 | 2009 | 2010 | 2011 | 2012 | 2013 | 2014   | 2015 | 2016 | 2017 | 2018 | 2019 | 2020 | 2021 | Total  | Meet criteria | Share (%) |
|------------|------|------|------|------|------|------|------|------|------|--------|------|------|------|------|------|------|------|--------|---------------|-----------|
| Solar      | 0    | 0    | 0    | 0    | 0    | 0    | 0    | 0    | 0    | 0      | 0    | 0    | 0    | 0    | 0    | 0    | 0    | 0      | -             | -         |
| Wind       | 0    | 0    | 0    | 0    | 0    | 0    | 0    | 0    | 0    | 49,367 | 0    | 0    | 0    | 0    | 0    | 0    | 0    | 49,367 | 0             | 0.00      |
| Geothermal | 0    | 0    | 0    | 0    | 0    | 0    | 0    | 0    | 0    | 0      | 0    | 0    | 0    | 0    | 0    | 0    | 0    | 0      | -             | -         |
| Biomass    | 0    | 0    | 0    | 0    | 0    | 0    | 0    | 0    | 0    | 0      | 0    | 0    | 0    | 0    | 0    | 0    | 0    | 0      | -             | -         |
| Hydro      | 0    | 0    | 0    | 0    | 0    | 0    | 0    | 0    | 0    | 0      | 0    | 0    | 0    | 0    | 0    | 0    | 0    | 0      | -             | -         |
|            |      |      |      |      |      |      |      |      |      |        |      |      |      |      |      |      |      | 49,367 | 0             | 0.00      |

  

| Vietnam    | 2005 | 2006 | 2007 | 2008 | 2009 | 2010 | 2011  | 2012 | 2013 | 2014 | 2015 | 2016 | 2017 | 2018 | 2019    | 2020 | 2021 | Total   | Meet criteria | Share (%) |
|------------|------|------|------|------|------|------|-------|------|------|------|------|------|------|------|---------|------|------|---------|---------------|-----------|
| Solar      | 0    | 0    | 0    | 0    | 0    | 0    | 0     | 0    | 0    | 0    | 0    | 0    | 0    | 0    | 330,316 | 0    | 0    | 330,316 | 0             | 0.00      |
| Wind       | 0    | 0    | 0    | 0    | 0    | 0    | 0     | 0    | 0    | 0    | 0    | 0    | 0    | 0    | 0       | 0    | 0    | 0       | -             | -         |
| Geothermal | 0    | 0    | 0    | 0    | 0    | 0    | 0     | 0    | 0    | 0    | 0    | 0    | 0    | 0    | 0       | 0    | 0    | 0       | -             | -         |
| Biomass    | 0    | 0    | 0    | 0    | 0    | 0    | 0     | 0    | 0    | 0    | 0    | 0    | 0    | 0    | 0       | 0    | 0    | 0       | -             | -         |
| Hydro      | 0    | 0    | 0    | 0    | 0    | 0    | 8,325 | 0    | 0    | 0    | 0    | 0    | 0    | 0    | 0       | 0    | 0    | 8,325   | 0             | 0.00      |
|            |      |      |      |      |      |      |       |      |      |      |      |      |      |      |         |      |      | 338,641 | 0             | 0.00      |

**Fig. S7. Application of registry additionality criteria for renewable energy credits (tCO<sub>2</sub>e) by country and technology**

Tables show the volume of credits that meet additionality criteria set by GS<sup>6</sup>, which require that renewable energy activities seeking registration as an offset project occur in a low-income or lower-middle income country where the penetration level of that energy technology is <5% of all grid-installed capacity. Data for country classifications and renewable energy penetration from World Bank<sup>7</sup> and IRENA<sup>8</sup>. 213,465 tCO<sub>2</sub>e of retirements from the ‘bundled renewables’ category in India are excluded because no corresponding classification exists in the IRENA data. Years during 2005-2021 reflect the start year for all renewable energy projects in the dataset. Years when a country is classified as a low-income or lower-middle income country are highlighted in light green in top row. All years with a penetration rate below 5% for each renewable energy technology are marked in light green. Years satisfying both criteria are marked in dark green and marked by a dark border. Years not meeting any criteria appear in white. Results for seven countries (Chile, Mauritius, South Africa, South Korea, Taiwan, Turkey, United States) are not shown because they were not classified as Low-income or Lower-middle income country during the period 2005-2021 and thus do not meet additionality criteria.

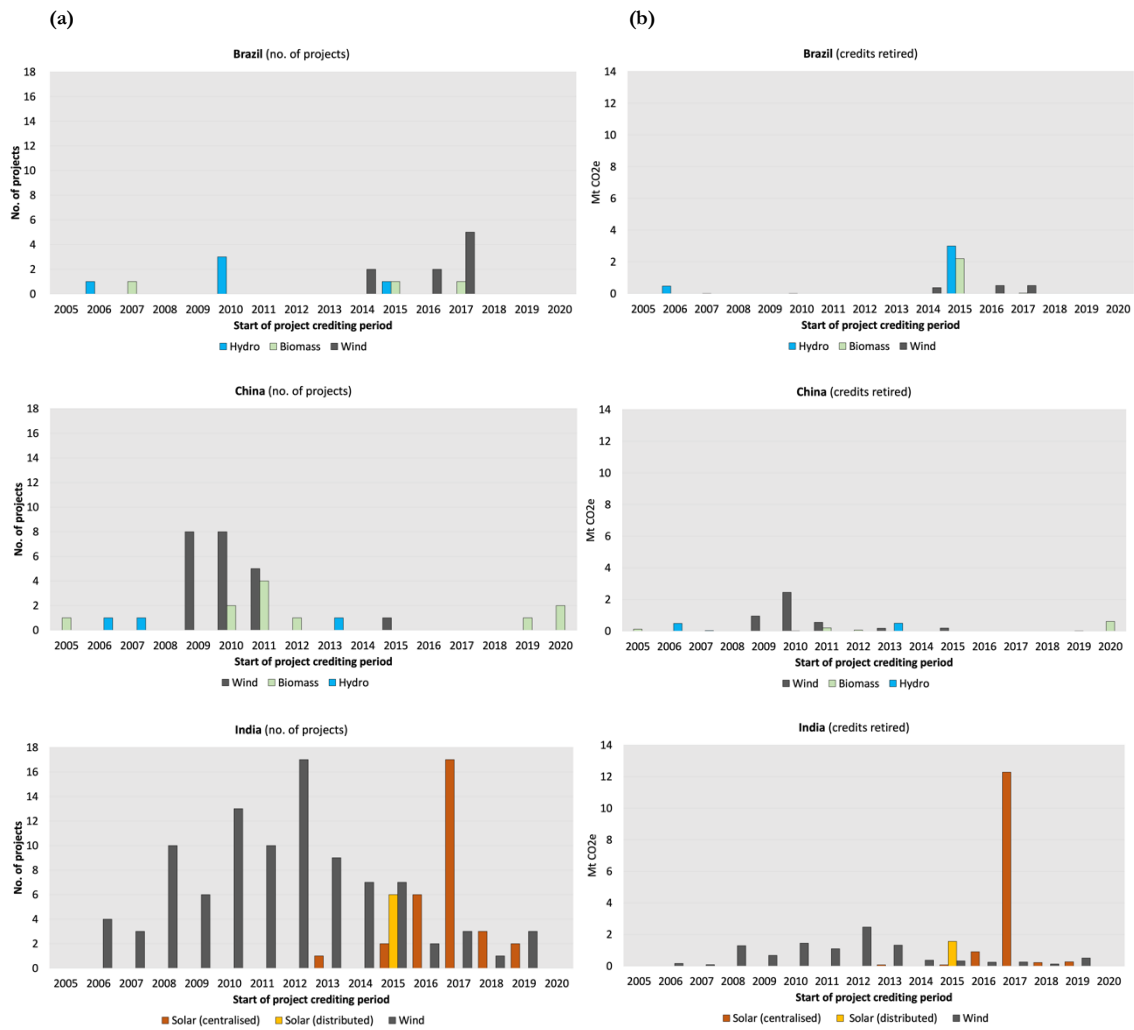

**Fig. S8. Renewable energy projects and credits retired in India, Brazil and China**

a) Number and type of renewable energy projects from which offset credits were retired in the three countries making up 84.4% of renewable energy retirements in the dataset. The x-axes reflect the distribution of project start dates, based on the first year that a project began to issue credits (i.e. the start of the first crediting issuance period). b) Absolute volume of offset credits retired from the same projects in the same three countries.

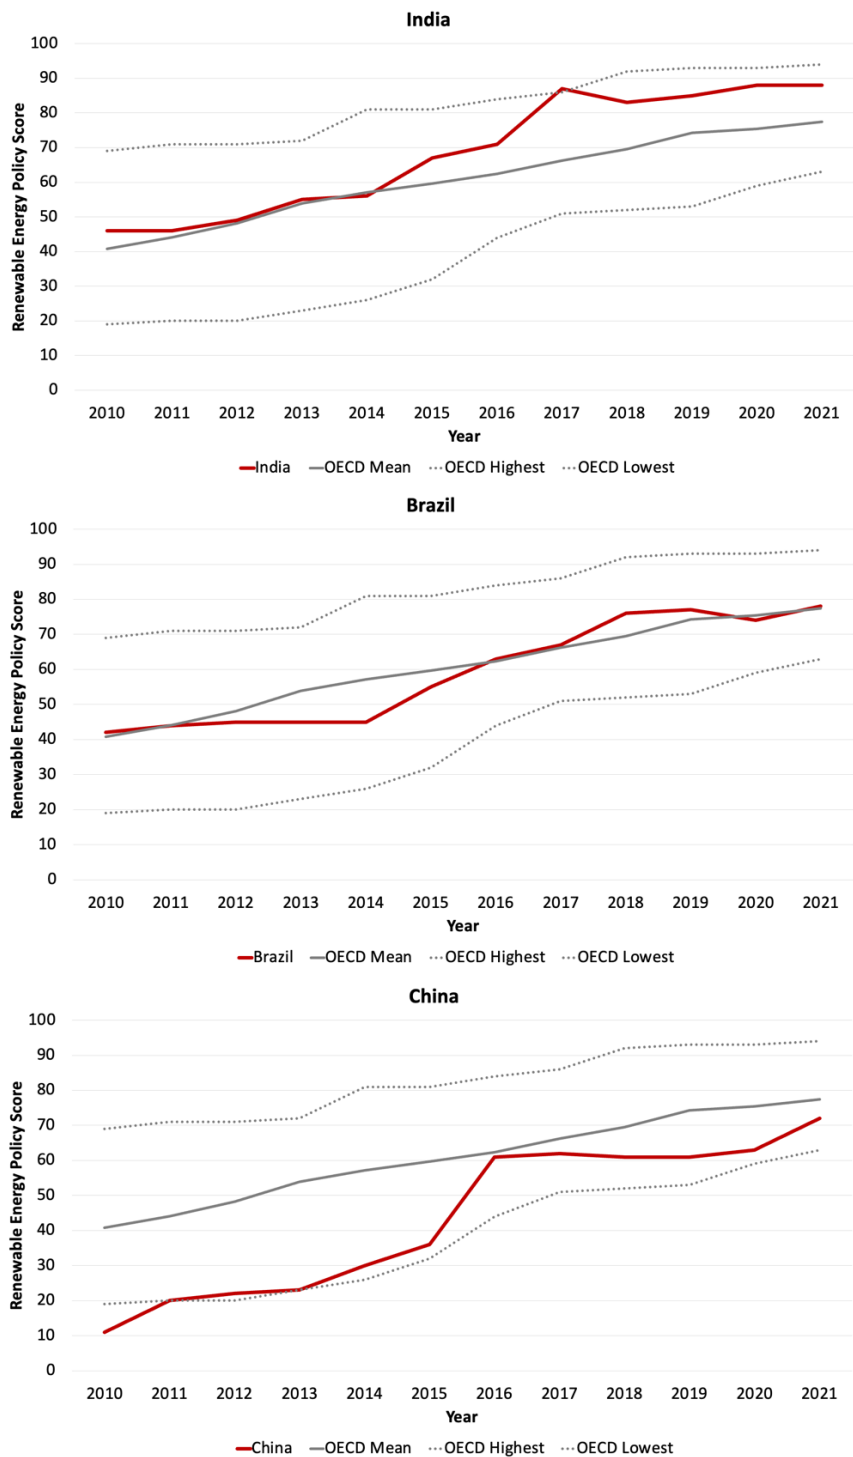

**Fig. S9. Supplementary policy analysis for top three offset-project countries**

Annual scores for Regulatory Indicators for Sustainable Energy (RISE) from World Bank<sup>9</sup> for the three countries supplying 84% of renewable energy credits used by the twenty companies. Figures show total scores for all seven indicators in RISE’s ‘renewable energy’ category. Scores for high-income OECD nations are shown for reference. To compute the mean score of OECD nations, we weighted the yearly score of each member nation by its population relative to the entire OECD in that year, and then tallied the scores. This analysis assumes that projects starting their credit issuing period during a time of supportive government policy would constitute a weak argument for additionality (see Fig. S7).



## References

1. CDM. *CDM Registry*. 2024 [cited 2024 February 10]; Available from: <https://cdm.unfccc.int/Registry/index.html>.
2. Gold Standard. *Gold Standard Foundation Registry*. 2024 [cited 2024 February 10]; Available from: <https://registry.goldstandard.org/projects?q=&page=1>.
3. Verified Carbon Standard. *Verra Search Page*. 2024 [cited 2024 February 10]; Available from: <https://registry.verra.org/app/search/VCS/All%20Projects>.
4. Net Zero Tracker. *Data Explorer*. 2023 [cited 2023 October 10]; Available from: <https://zerotracker.net>.
5. Ecosystem Marketplace. *EM Reports and Resources on Global Carbon Markets*. 2023 [cited 2023 August 1]; Available from: <https://www.ecosystemmarketplace.com/carbon-markets/>.
6. Gold Standard. *Renewable Energy Requirements Version 1.4*. 2021 [cited 2023 October 10]; Available from: [https://globalgoals.goldstandard.org/standards/202\\_V1.4\\_AR-Renewable-Energy-Activity-Requirements.pdf](https://globalgoals.goldstandard.org/standards/202_V1.4_AR-Renewable-Energy-Activity-Requirements.pdf).
7. World Bank. *World Bank Country and Lending Groups*. 2023 [cited 2023 October 10]; Available from: <https://datahelpdesk.worldbank.org/knowledgebase/articles/906519-world-bank-country-and-lending-groups>.
8. IRENA. *Renewable Capacity Statistics*. 2023 [cited 2023 August 25]; Available from: [https://pxweb.irena.org/pxweb/en/IRENASTAT/IRENASTAT\\_Power%20Capacity%20and%20Generation/RESHARE\\_2023\\_cycle2.px/](https://pxweb.irena.org/pxweb/en/IRENASTAT/IRENASTAT_Power%20Capacity%20and%20Generation/RESHARE_2023_cycle2.px/).
9. World Bank Group. *Regulatory Indicators for Sustainable Energy (RISE)*. 2023 [cited 2023 August 30]; Available from: <https://rise.esmap.org/reports>.
