# Supplementary material for: Demand for low-quality offsets by major companies undermines climate integrity of the voluntary carbon market
Source: PubMed Central journal article supplement — Nat Commun. 2024 Aug 10;15:6863. doi: 10.1038/s41467-024-51151-w (PMC11316763; doi:10.1038/s41467-024-51151-w), 2024-08-10
Supplement: 41467_2024_51151_MOESM3_ESM.pdf [file 41467_2024_51151_MOESM3_ESM.pdf]

### **Description of Additional Supplementary Files**

File Name: Supplementary Data 1

Description: This file contains the volume and characteristics of the offsets retired by the twenty companies.
